# Supplementary material for: Reduction Expansion Synthesis as Strategy to Control Nitrogen Doping Level and Surface Area in Graphene
Source: PubMed Central journal article supplement (PMC5455405; doi:10.3390/ma8105359), 2015-10-16
Supplement: materials-08-05359-s001.pdf [file materials-08-05359-s001.pdf]

## Supplementary Materials

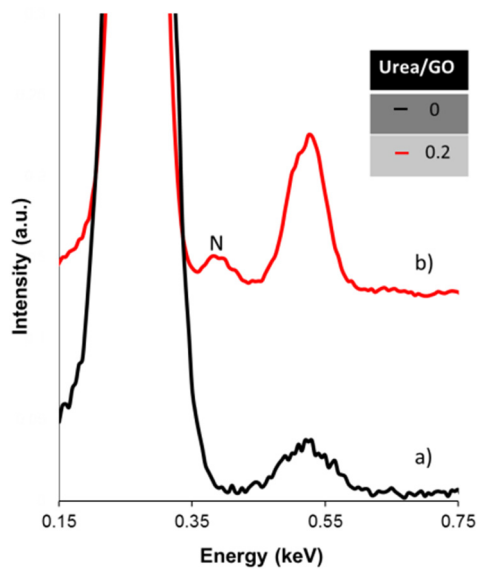

**Figure S1.** Energy dispersive X-ray spectroscopy (EDS) spectra of samples of reduced graphene. (a) Graphene from bare GO (no urea) and (b) Graphene doped from precursor with urea/GO ratio = 0.2 showing a small nitrogen peak (N-K peak at 392 eV).
